# Supplementary material for: Designing, docking and molecular dynamics simulation studies of novel cloperastine analogues as anti-allergic agents: homology modeling and active site prediction for the human histamine H1 receptor
Source: Royal Society of Chemistry journal article supplement (doi:10.1039/c9ra09245e), 2020-01-01
Supplement: c9ra09245e1.pdf [file c9ra09245e1.pdf]

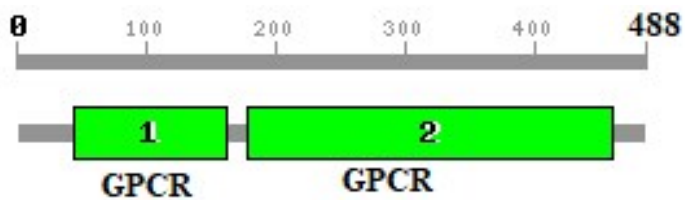

**Figure 1:** Histamine H1 receptor showed two similar domains of GPCR from 45-162 and 178-461 amino acids.

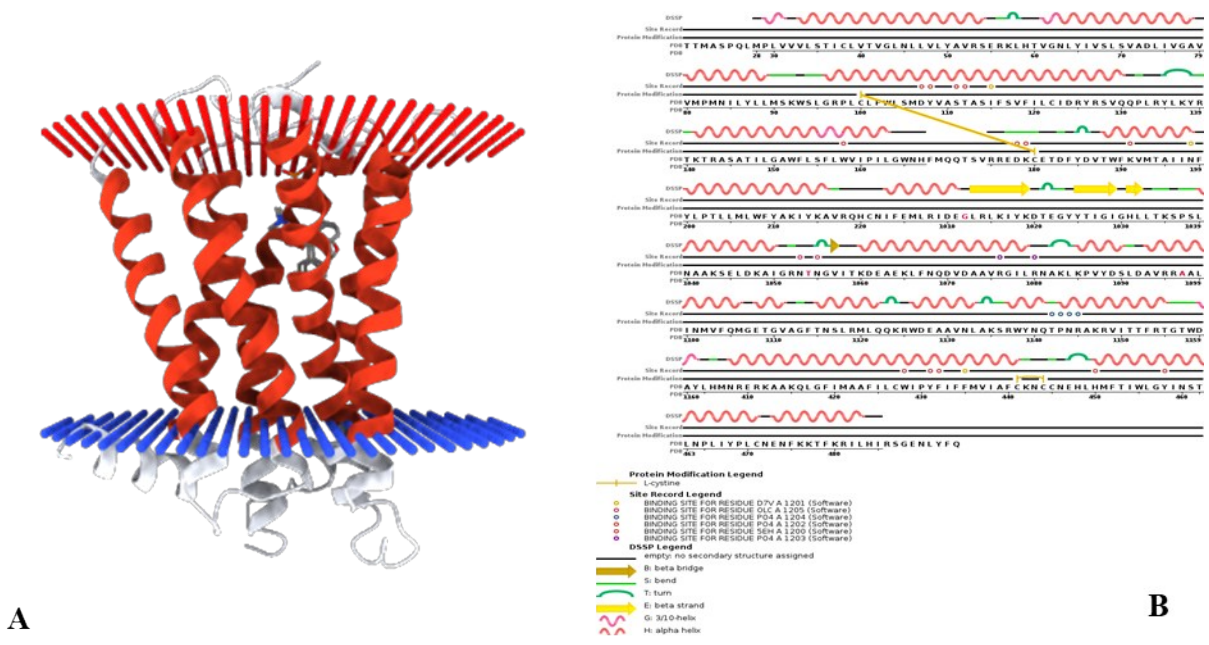

**Figure 2:**A) Structure of template 3RZE and B) Secondary structure prediction of 3RZE

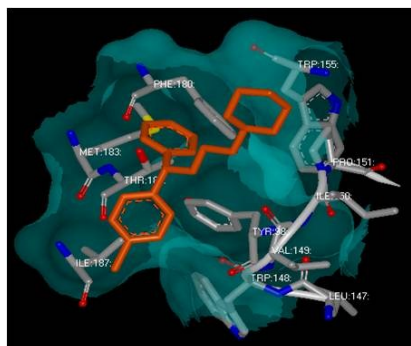

a) CLOPERASTINE

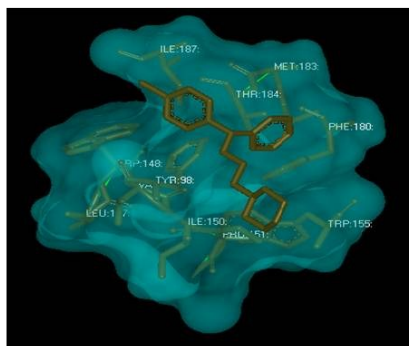

b) Derivative 1

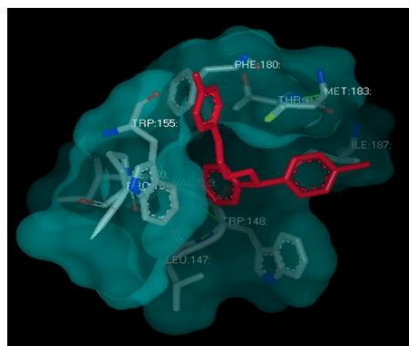

c) Derivative 4

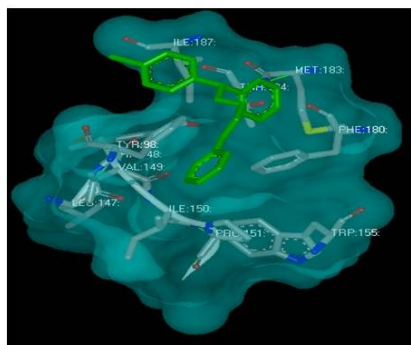

d) Derivative 5

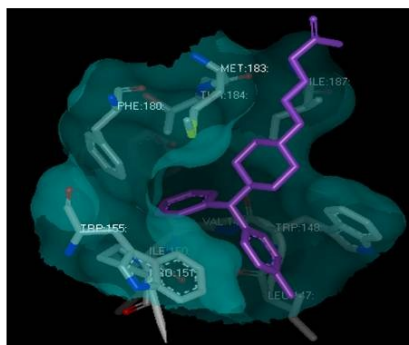

e) Derivative 6

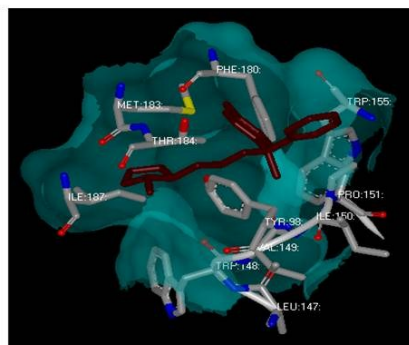

f) Derivative 7

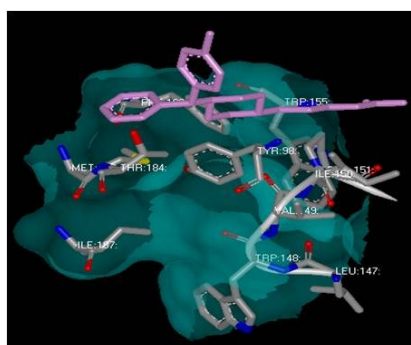

g) Derivative 8

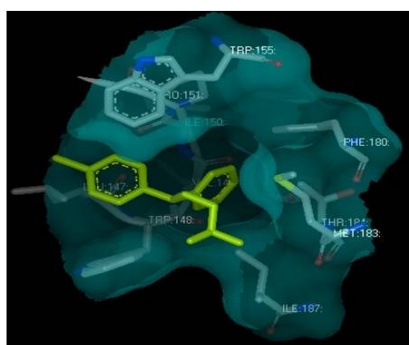

h) Derivative 9

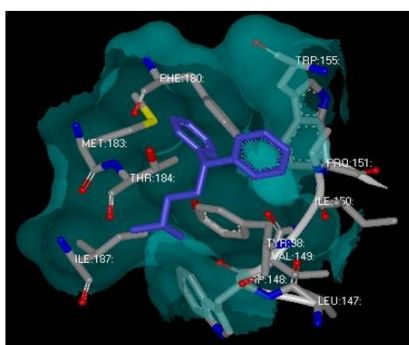

i) Derivative 10

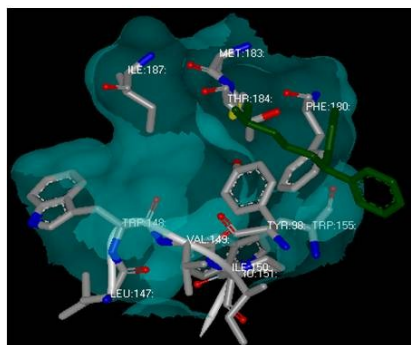

j) Derivative 11

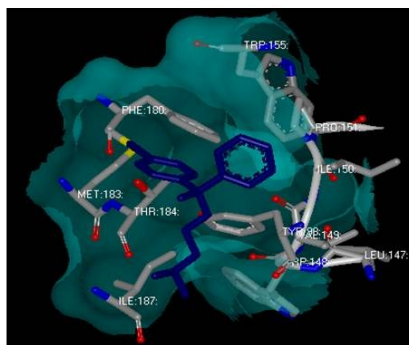

k) Derivative 13

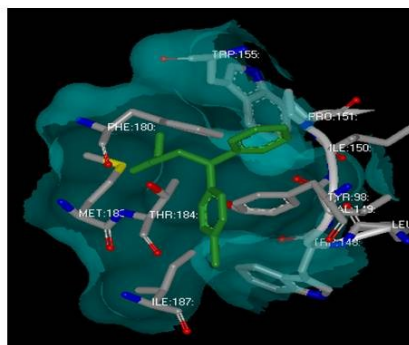

l) Derivative 15



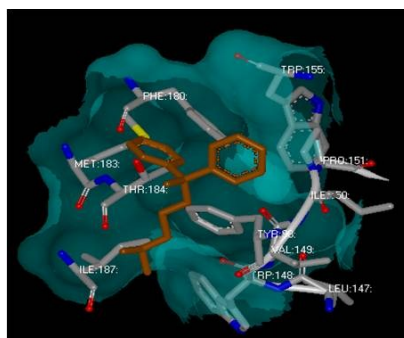

m) Derivative 16

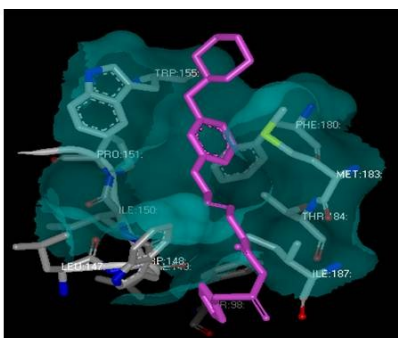

n) Derivative 17

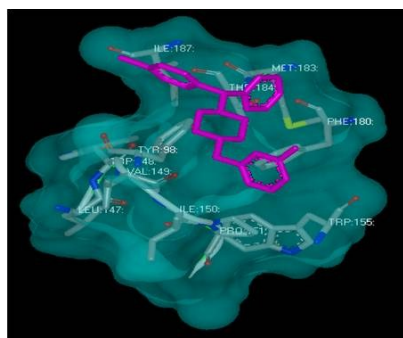

o) Derivative 18

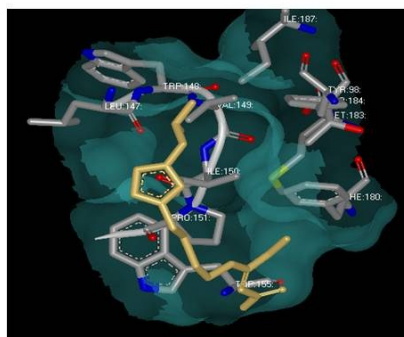

p) Derivative 19

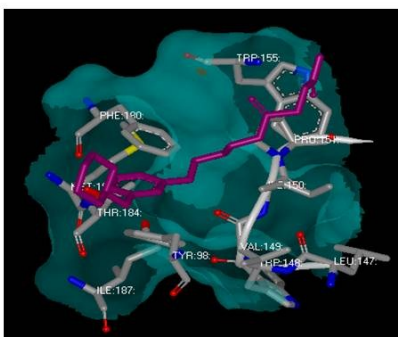

q) Derivative 20

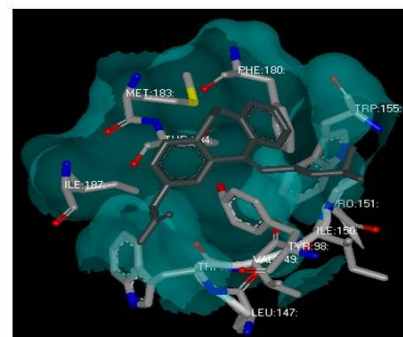

r) Derivative 23

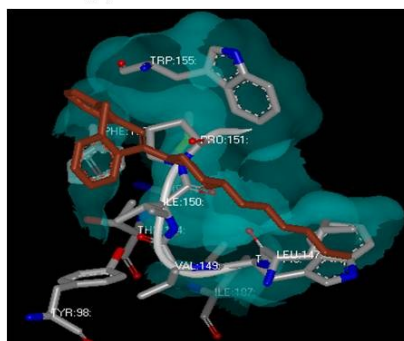

s) Derivative 24

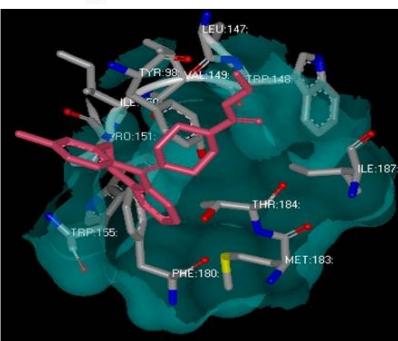

t) Derivative 25

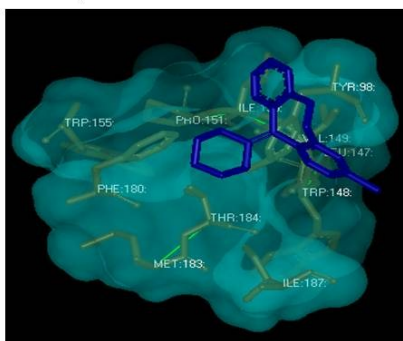

u) Derivative 26

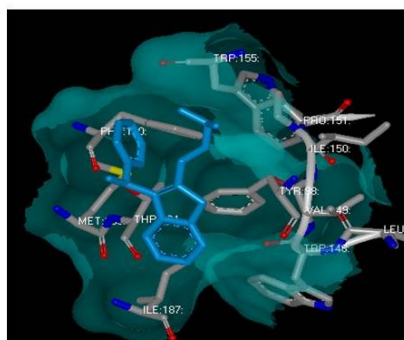

v) Derivative 27

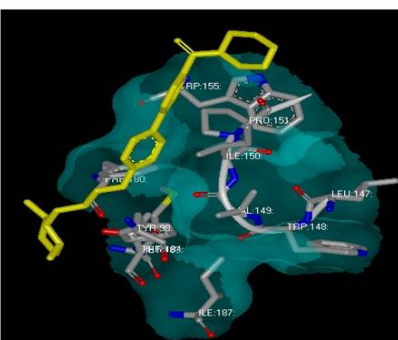

w) Derivative 28

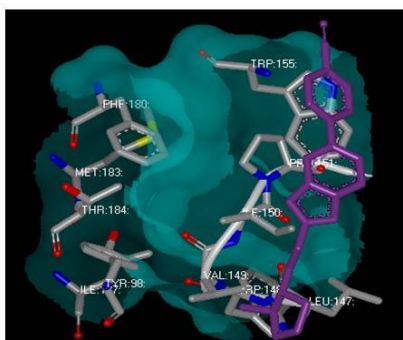

x) Derivative 29

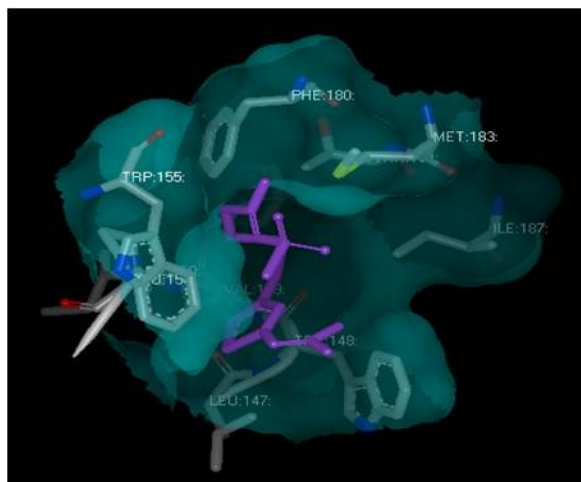

y) Derivative 33

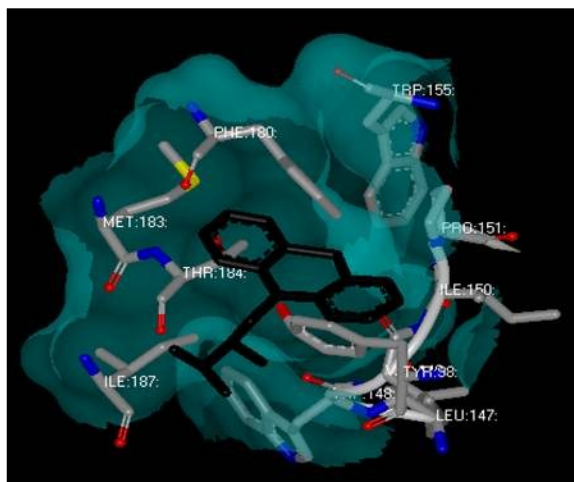

z) Derivative 35

**Figure 3** Docking studies of Histamine H1 receptor with Cloperastine derivatives (3a-3z)

**Table 1** Molecular properties of Cloperastine derivatives

| Compounds                                                                          | miLog P | TPSA   | natoms | MW      | nO<br>N | nOH<br>NH | nvio<br>lati<br>ons | nr<br>otb | VOLUM<br>E |
|------------------------------------------------------------------------------------|---------|--------|--------|---------|---------|-----------|---------------------|-----------|------------|
| Cloperastine(C <sub>20</sub><br>H <sub>24</sub> ClNO)                              | 1.187   | 66.761 | 12.0   | 168.148 | 4       | 2         | 0                   | 2         | 144.608    |
| Derivative 1<br>(C <sub>19</sub> H <sub>22</sub> ClNO <sub>2</sub> )               | 0.841   | 49.69  | 12.0   | 168.192 | 3       | 2         | 0                   | 2         | 159.014    |
| Derivative 2<br>(C <sub>37</sub> H <sub>35</sub> Cl <sub>2</sub> NO <sub>2</sub> ) | -0.043  | 69.918 | 12.0   | 170.164 | 4       | 3         | 0                   | 2         | 150.47     |
| Derivative 3<br>(C <sub>40</sub> H <sub>41</sub> Cl <sub>2</sub> NO <sub>4</sub> ) | 0.614   | 49.69  | 11.0   | 154.165 | 3       | 2         | 0                   | 2         | 142.42     |
| Derivative 4<br>(C <sub>21</sub> H <sub>20</sub> ClNO)                             | 0.254   | 41.533 | 11.0   | 135.149 | 2       | 1         | 0                   | 3         | 145.591    |
| Derivative 5<br>(C <sub>22</sub> H <sub>22</sub> ClNO)                             | 1.204   | 75.995 | 14.0   | 198.174 | 5       | 2         | 0                   | 3         | 170.154    |
| Derivative 6<br>(C <sub>23</sub> H <sub>30</sub> N <sub>2</sub> O <sub>2</sub> )   | 0.027   | 79.152 | 14.0   | 200.19  | 5       | 3         | 0                   | 3         | 176.016    |
| Derivative 7<br>(C <sub>21</sub> H <sub>26</sub> ClNO)                             | 0.631   | 58.924 | 13.0   | 184.191 | 4       | 2         | 0                   | 3         | 167.972    |
| Derivative 8<br>(C <sub>21</sub> H <sub>25</sub> ClN <sub>2</sub> O <sub>3</sub> ) | -1.524  | 55.767 | 14.0   | 198.218 | 4       | 1         | 0                   | 3         | 184.936    |
| Derivative 9<br>(C <sub>21</sub> H <sub>28</sub> ClNO)                             | 1.76    | 45.767 | 13.0   | 182.175 | 4       | 1         | 0                   | 3         | 142.136    |
| Derivative 10<br>(C <sub>16</sub> H <sub>20</sub> N <sub>2</sub> )                 | 0.641   | 39.69  | 10.0   | 143.192 | 4       | 2         | 0                   | 1         | 144.014    |
| Derivative 11<br>(C <sub>17</sub> H <sub>21</sub> NO)                              | -0.033  | 72.918 | 11.0   | 150.164 | 4       | 2         | 0                   | 1         | 140.47     |
| Derivative 12<br>(C <sub>32</sub> H <sub>39</sub> NO <sub>2</sub> )                | 0.046   | 31.533 | 13.0   | 167.149 | 2       | 1         | 0                   | 1         | 146.591    |
| Derivative 13<br>(C <sub>18</sub> H <sub>22</sub> BrNO)                            | 1.204   | 75.995 | 14.0   | 198.174 | 5       | 2         | 0                   | 3         | 170.154    |
| Derivative 14<br>(C <sub>32</sub> H <sub>39</sub> NO <sub>4</sub> )                | 0.548   | 86.152 | 13.0   | 270.19  | 4       | 3         | 0                   | 2         | 185.016    |
| Derivative 15<br>(C <sub>16</sub> H <sub>19</sub> ClN <sub>2</sub> )               | 0.512   | 53.69  | 13.0   | 148.165 | 2       | 2         | 0                   | 2         | 152.42     |
| Derivative 16<br>(C <sub>17</sub> H <sub>22</sub> N <sub>2</sub> O)                | 1.322   | 32.21  | 13.0   | 145.149 | 2       | 1         | 0                   | 1         | 125.23     |
| Derivative 17<br>(C <sub>22</sub> H <sub>29</sub> N <sub>3</sub> O <sub>4</sub> S) | 1.254   | 67.995 | 13.0   | 188.174 | 4       | 2         | 0                   | 2         | 148.154    |
| Derivative 18<br>(C <sub>25</sub> H <sub>27</sub> ClN <sub>2</sub> )               | 0.127   | 48.152 | 13.0   | 210.19  | 4       | 2         | 0                   | 2         | 155.016    |
| Derivative 19<br>(C <sub>13</sub> H <sub>22</sub> N <sub>4</sub> O <sub>3</sub> S) | 0.545   | 45.924 | 12.0   | 176.191 | 3       | 2         | 0                   | 2         | 175.972    |
| Derivative 20<br>(C <sub>19</sub> H <sub>28</sub> N <sub>2</sub> O <sub>4</sub> )  | 1.235   | 47.767 | 14.0   | 185.218 | 4       | 1         | 0                   | 3         | 177.936    |

|                                                                                                 |       |        |      |         |   |   |   |   |         |
|-------------------------------------------------------------------------------------------------|-------|--------|------|---------|---|---|---|---|---------|
| Derivative 21<br>(C <sub>15</sub> H <sub>24</sub> N <sub>4</sub> S)                             | 0.89  | 44.767 | 11.0 | 182.175 | 4 | 1 | 0 | 3 | 157.136 |
| Derivative 22<br>(C <sub>13</sub> H <sub>15</sub> ClN <sub>4</sub> O)                           | 0.841 | 41.69  | 14.0 | 184.192 | 4 | 1 | 0 | 3 | 158.014 |
| Derivative 23<br>(C <sub>21</sub> H <sub>23</sub> NO <sub>3</sub> )                             | -0.53 | 42.918 | 11.0 | 154.164 | 3 | 2 | 0 | 1 | 148.47  |
| Derivative 24<br>C <sub>21</sub> H <sub>25</sub> N <sub>3</sub> O <sub>2</sub> S                | 0.452 | 35.533 | 13.0 | 141.149 | 5 | 1 | 0 | 3 | 142.591 |
| Derivative 25<br>(C <sub>22</sub> H <sub>23</sub> ClN <sub>2</sub> O <sub>2</sub> )             | 0.732 | 53.69  | 13.0 | 144.165 | 3 | 1 | 0 | 1 | 132.42  |
| Derivative 26<br>(C <sub>19</sub> H <sub>19</sub> ClN <sub>2</sub> )                            | 0.527 | 33.542 | 12.0 | 146.149 | 4 | 1 | 0 | 1 | 145.591 |
| Derivative 27<br>(C <sub>20</sub> H <sub>24</sub> N <sub>2</sub> )                              | 1.342 | 54.995 | 13.0 | 176.174 | 4 | 2 | 0 | 3 | 136.154 |
| Derivative 28<br>(C <sub>26</sub> H <sub>34</sub> N <sub>2</sub> O <sub>3</sub> )               | 1.027 | 87.152 | 13.0 | 185.19  | 4 | 1 | 0 | 2 | 144.016 |
| Derivative 29<br>(C <sub>22</sub> H <sub>22</sub> N <sub>2</sub> O)                             | 0.487 | 67.924 | 13.0 | 176.191 | 4 | 2 | 0 | 3 | 155.972 |
| Derivative 30<br>(C <sub>9</sub> H <sub>16</sub> N <sub>6</sub> S)                              | 1.325 | 46.767 | 13.0 | 176.218 | 3 | 1 | 0 | 2 | 176.936 |
| Derivative 31<br>(C <sub>16</sub> H <sub>18</sub> N <sub>2</sub> O <sub>2</sub> )               | 1.65  | 45.767 | 13.0 | 162.175 | 4 | 1 | 0 | 3 | 152.136 |
| Derivative 32<br>(C <sub>14</sub> H <sub>17</sub> ClN <sub>4</sub> S)                           | 1.853 | 45.275 | 14.0 | 187.174 | 4 | 2 | 0 | 2 | 158.154 |
| Derivative 33<br>(C <sub>8</sub> H <sub>15</sub> N <sub>7</sub> O <sub>2</sub> S <sub>3</sub> ) | 0.477 | 32.152 | 12.0 | 416.19  | 4 | 3 | 0 | 2 | 155.016 |
| Derivative 34<br>(C <sub>14</sub> H <sub>16</sub> ClN <sub>3</sub> O)                           | 1.456 | 76.924 | 13.0 | 175.191 | 4 | 2 | 0 | 2 | 174.972 |
| Derivative 35<br>(C <sub>17</sub> H <sub>20</sub> N <sub>2</sub> S)                             | 1.624 | 65.767 | 12.0 | 163.218 | 4 | 1 | 0 | 3 | 146.936 |

**Table 2** Bioactivity studies of Cloperastine derivatives

| <b>Compounds<br/>(Molecular<br/>Formula)</b>                                       | <b>GPCR<br/>ligand</b> | <b>Ion channel<br/>modulator</b> | <b>Kinase<br/>inhibitor</b> | <b>Nuclear<br/>receptor ligand</b> | <b>Protease<br/>inhibitor</b> | <b>Enzyme<br/>inhibitor</b> |
|------------------------------------------------------------------------------------|------------------------|----------------------------------|-----------------------------|------------------------------------|-------------------------------|-----------------------------|
| Cloperastine(C <sub>20</sub> H <sub>24</sub> ClNO)                                 | -0.75                  | -0.46                            | -0.95                       | -0.63                              | -1.2                          | -0.34                       |
| Derivative 1<br>(C <sub>19</sub> H <sub>22</sub> ClNO <sub>2</sub> )               | -0.68                  | -0.35                            | -0.84                       | -0.55                              | -0.12                         | -0.33                       |
| Derivative 2<br>(C <sub>37</sub> H <sub>35</sub> Cl <sub>2</sub> NO <sub>2</sub> ) | -0.76                  | -0.27                            | -0.93                       | -0.63                              | -0.09                         | -0.21                       |
| Derivative 3<br>(C <sub>40</sub> H <sub>41</sub> Cl <sub>2</sub> NO <sub>4</sub> ) | -0.88                  | -0.24                            | -0.86                       | -0.78                              | -1.01                         | -0.39                       |
| Derivative 4<br>(C <sub>21</sub> H <sub>20</sub> ClNO)                             | -1.50                  | -0.56                            | -1.14                       | -0.92                              | -0.65                         | -0.65                       |
| Derivative 5<br>(C <sub>22</sub> H <sub>22</sub> ClNO)                             | -0.68                  | -0.24                            | -0.68                       | -0.45                              | -1.82                         | -0.12                       |
| Derivative 6<br>(C <sub>23</sub> H <sub>30</sub> N <sub>2</sub> O <sub>2</sub> )   | -0.67                  | -0.07                            | -0.63                       | -0.43                              | -1.79                         | -0.08                       |
| Derivative 7<br>(C <sub>21</sub> H <sub>26</sub> ClNO)                             | -0.52                  | -0.14                            | -0.63                       | -0.56                              | -1.72                         | -0.07                       |
| Derivative 8<br>(C <sub>21</sub> H <sub>25</sub> ClN <sub>2</sub> O <sub>3</sub> ) | -0.88                  | -0.26                            | -1.14                       | -0.67                              | -1.51                         | 0.05                        |
| Derivative 9<br>(C <sub>21</sub> H <sub>28</sub> ClNO)                             | -0.56                  | -0.48                            | -0.93                       | -0.55                              | -0.41                         | -0.23                       |
| Derivative 10<br>(C <sub>16</sub> H <sub>20</sub> N <sub>2</sub> )                 | -0.88                  | -0.22                            | -0.92                       | -0.64                              | -1.29                         | -0.12                       |
| Derivative 11<br>(C <sub>17</sub> H <sub>21</sub> NO)                              | -0.83                  | -0.25                            | -0.86                       | -0.73                              | -1.51                         | -0.19                       |
| Derivative 12<br>(C <sub>32</sub> H <sub>39</sub> NO <sub>2</sub> )                | -1.30                  | -0.56                            | -1.17                       | -0.98                              | -1.25                         | -0.63                       |
| Derivative 13<br>(C <sub>18</sub> H <sub>22</sub> BrNO)                            | -0.62                  | -0.24                            | -0.68                       | -0.45                              | -0.42                         | -0.14                       |
| Derivative 14<br>(C <sub>32</sub> H <sub>39</sub> NO <sub>4</sub> )                | -0.68                  | -0.03                            | -0.64                       | -0.44                              | -0.39                         | -0.08                       |
| Derivative 15<br>(C <sub>16</sub> H <sub>19</sub> ClN <sub>2</sub> )               | -0.75                  | -0.48                            | -0.93                       | -0.65                              | -1.02                         | -0.31                       |
| Derivative 16<br>(C <sub>17</sub> H <sub>22</sub> N <sub>2</sub> O)                | -0.66                  | -0.33                            | -0.82                       | -0.58                              | -1.32                         | -0.36                       |
| Derivative 17<br>(C <sub>22</sub> H <sub>29</sub> N <sub>3</sub> O <sub>4</sub> S) | -0.89                  | -0.23                            | -0.98                       | -0.64                              | -1.19                         | -0.28                       |
| Derivative 18<br>(C <sub>25</sub> H <sub>27</sub> ClN <sub>2</sub> )               | -0.82                  | -0.26                            | -0.82                       | -0.73                              | -0.11                         | -0.19                       |
| Derivative 19                                                                      | -1.40                  | -0.51                            | -1.14                       | -0.98                              | -0.65                         | -0.65                       |



|                                                                                                 |       |       |       |       |       |       |
|-------------------------------------------------------------------------------------------------|-------|-------|-------|-------|-------|-------|
| (C <sub>13</sub> H <sub>22</sub> N <sub>4</sub> O <sub>3</sub> S)                               |       |       |       |       |       |       |
| Derivative 20<br>(C <sub>19</sub> H <sub>28</sub> N <sub>2</sub> O <sub>4</sub> )               | -0.63 | -0.07 | -0.69 | -0.43 | -0.59 | -0.08 |
| Derivative 21<br>(C <sub>15</sub> H <sub>24</sub> N <sub>4</sub> S)                             | -0.61 | -0.13 | -0.62 | -0.54 | -0.42 | -0.07 |
| Derivative 22<br>(C <sub>13</sub> H <sub>15</sub> ClN <sub>4</sub> O)                           | -0.57 | -0.22 | -1.16 | -0.66 | -0.31 | 0.05  |
| Derivative 23<br>(C <sub>21</sub> H <sub>23</sub> NO <sub>3</sub> )                             | -0.45 | -0.26 | -0.84 | -0.73 | -1.31 | -0.19 |
| Derivative 24<br>C <sub>21</sub> H <sub>25</sub> N <sub>3</sub> O <sub>2</sub> S                | -1.60 | -0.55 | -1.12 | -0.98 | -1.25 | -0.65 |
| Derivative 25<br>(C <sub>22</sub> H <sub>23</sub> ClN <sub>2</sub> O <sub>2</sub> )             | -0.35 | -0.26 | -0.68 | -0.43 | -0.12 | -0.18 |
| Derivative 26<br>(C <sub>19</sub> H <sub>19</sub> ClN <sub>2</sub> )                            | -0.74 | -0.08 | -0.64 | -0.46 | -0.59 | -0.08 |
| Derivative 27<br>(C <sub>20</sub> H <sub>24</sub> N <sub>2</sub> )                              | -1.85 | -0.45 | -0.94 | -0.65 | -1.22 | -0.38 |
| Derivative 28<br>(C <sub>26</sub> H <sub>34</sub> N <sub>2</sub> O <sub>3</sub> )               | -1.64 | -0.34 | -0.83 | -0.55 | -1.32 | -0.39 |
| Derivative 29<br>(C <sub>22</sub> H <sub>22</sub> N <sub>2</sub> O)                             | -1.84 | -0.25 | -0.97 | -0.64 | -1.29 | -0.26 |
| Derivative 30<br>(C <sub>9</sub> H <sub>16</sub> N <sub>6</sub> S)                              | -0.41 | -0.28 | -0.82 | -0.73 | -1.41 | -0.19 |
| Derivative 31<br>(C <sub>16</sub> H <sub>18</sub> N <sub>2</sub> O <sub>2</sub> )               | -0.20 | -0.55 | -1.12 | -0.98 | -1.35 | -0.65 |
| Derivative 32<br>(C <sub>14</sub> H <sub>17</sub> ClN <sub>4</sub> S)                           | -0.34 | -0.23 | -0.94 | -0.65 | -1.19 | -0.24 |
| Derivative 33<br>(C <sub>8</sub> H <sub>15</sub> N <sub>7</sub> O <sub>2</sub> S <sub>3</sub> ) | -0.71 | -0.27 | -0.85 | -0.76 | -1.21 | -0.79 |
| Derivative 34<br>(C <sub>14</sub> H <sub>16</sub> ClN <sub>3</sub> O)                           | -1.40 | -0.55 | -1.17 | -0.93 | -1.25 | -0.67 |
| Derivative 35<br>(C <sub>17</sub> H <sub>20</sub> N <sub>2</sub> S)                             | -0.88 | -0.25 | -0.88 | -0.72 | -1.11 | -0.89 |
